# Supplementary material
Source: Springer Nature journal article supplement (https://www.springermedizin.de/resource/supplementary/12881_2009_629_MOESM4_ESM.pdf/9451096)

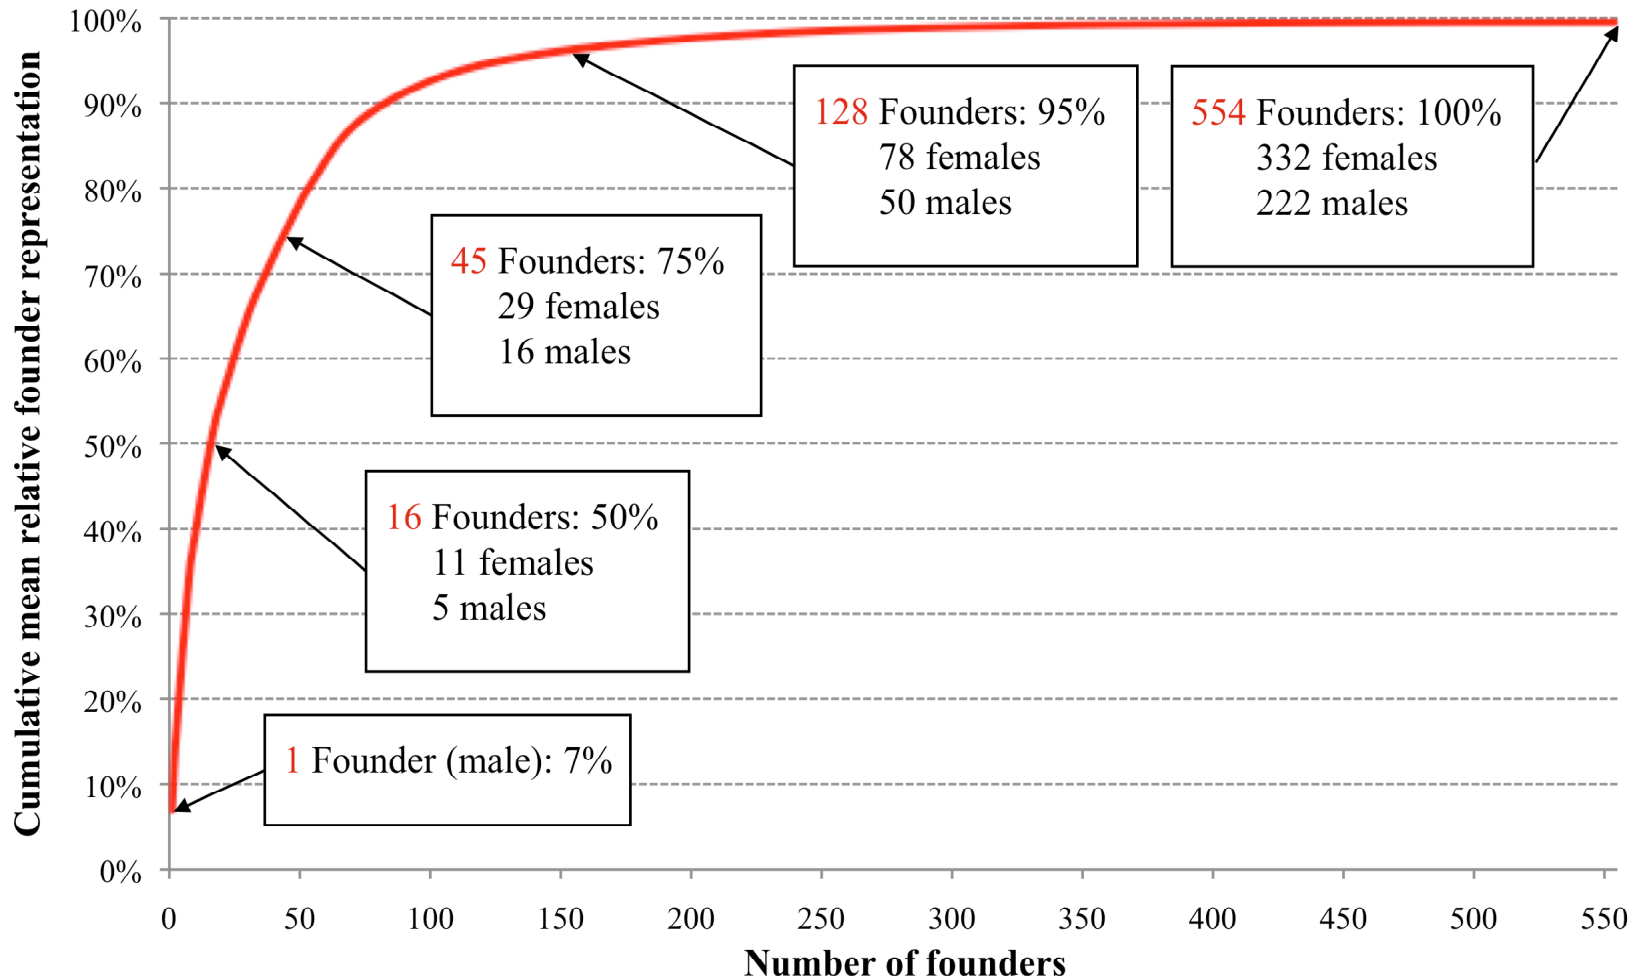

Supplement: MOESM4 [file 9451096]
